# Supplementary material for: Large area few-layer graphene with scalable preparation from waste biomass for high-performance supercapacitor
Source: PubMed Central journal article supplement (PMC5681691; doi:10.1038/s41598-017-15463-w), 2017-11-10
Supplement: 41598_2017_15463_MOESM1_ESM.pdf [file 41598_2017_15463_MOESM1_ESM.pdf]

Supporting Information

# **Large area few-layered graphene with scalable preparation from waste biomass for high performance supercapacitor**

Taniya Purkait, Guneet Singh, Mandeep Singh, Dinesh Kumar, Ramendra Sundar Dey\*

Institute of Nano Science and Technology (INST), Mohali-160064, Punjab, India.  
Email: [rsdey@inst.ac.in](mailto:rsdey@inst.ac.in) (R. S. Dey)

### Formula and equation used in the manuscript.

The specific capacitance ( $C_{sp}$ ) can be calculated from cyclic voltammetry via the equation

$$C_{sp} = \frac{I_{avg}}{m\Delta v} \quad (1)$$

where  $I_{avg}$  is the average current obtained from cathodic and anodic sweeps,  $v$  is the scan rate, and  $m$  is the active mass of the pErGO material interdigitated onto the electrode surface.

The specific capacitance,  $C_{SP}$  was also calculated from galvanostatic charge-discharge curves by equation (2) as following

$$C_{SP} = \frac{I\Delta t}{\Delta V M} \quad (2)$$

where,  $I$  (in A) is the discharge current,  $\Delta t$  (in s) is the discharge time,  $M$  (in g) is the active mass of device, and  $\Delta V$  (in V) is the working voltage.

The energy density ( $E$ ) and power density ( $P$ ) of the supercapacitor system can be expressed by equation. (3) and (4) as following

$$E = \frac{\Delta V^2}{2 \times 3600} C_{SP} \quad (3)$$

$$P = \frac{E \times 3600}{\Delta t} \quad (4)$$

Where ( $C_{sp}$ ) is the mass specific capacitance.

Supporting data

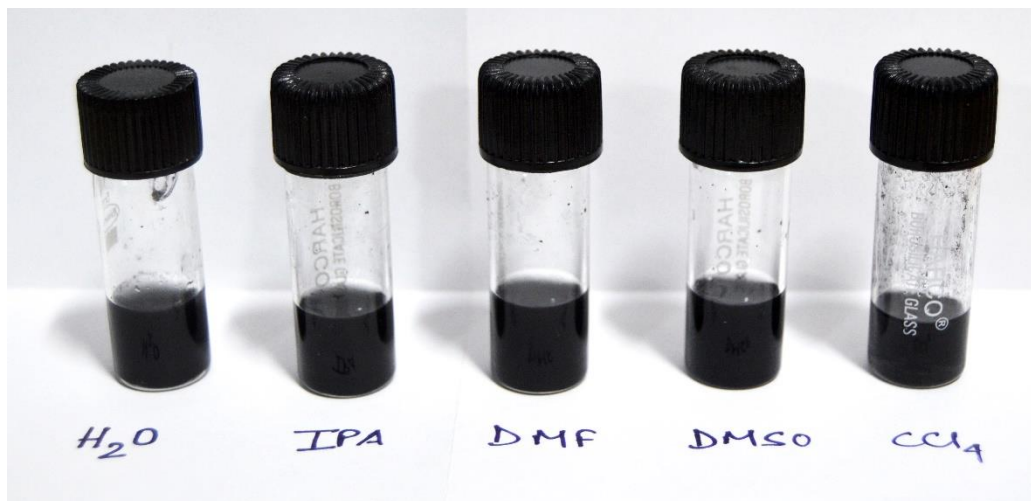

Figure S1: Digital picture of PS-FLG dispersed in solvent of different polarities like water, isopropanol, dimethylformamide, dimethyl sulfoxide and carbon tetrachloride.

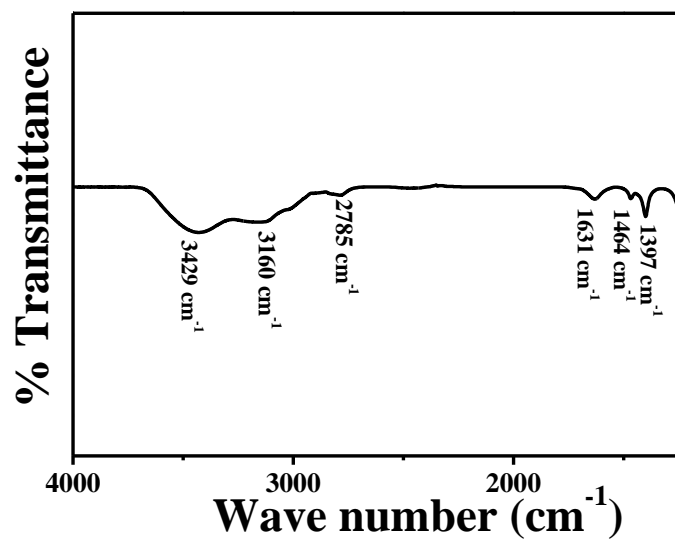

Figure S2: FT-IR spectrum of PS-FLG

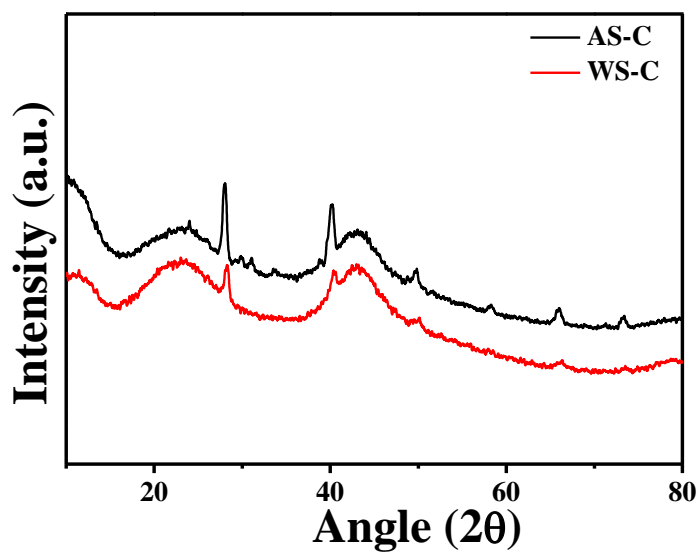

Figure S3: Comparative XRD analysis of WS-C and AS-C.

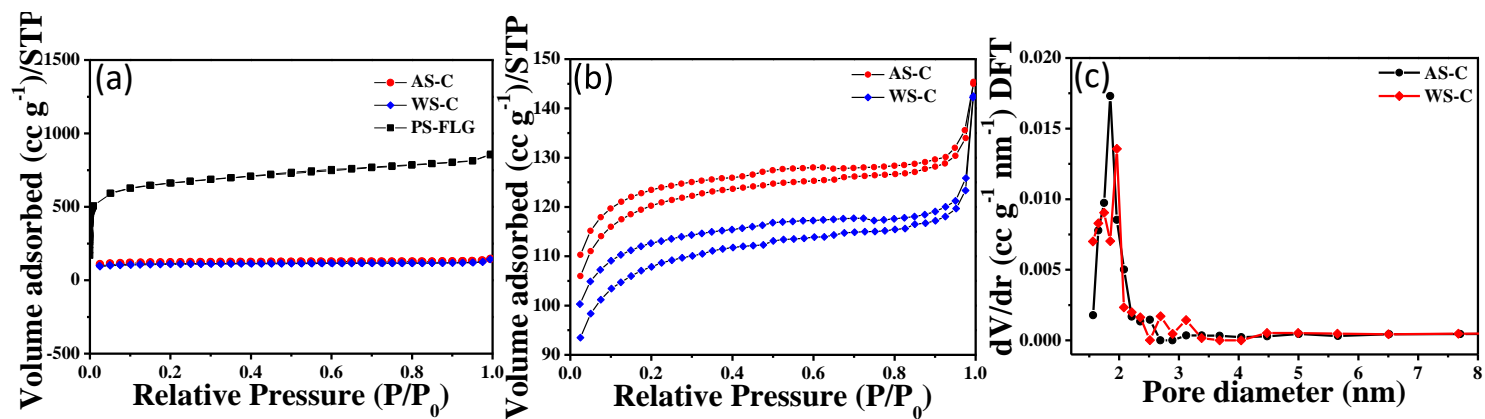

Figure S4: (a) Comparison of  $\text{N}_2$  sorption analysis isotherm of PS-FLG with other nutshell derived carbon and (b) Magnified view of figure (a): BET adsorption isotherm plots of AS-C and WS-C. (c) pore size distribution plots of AS-C and WS-C.

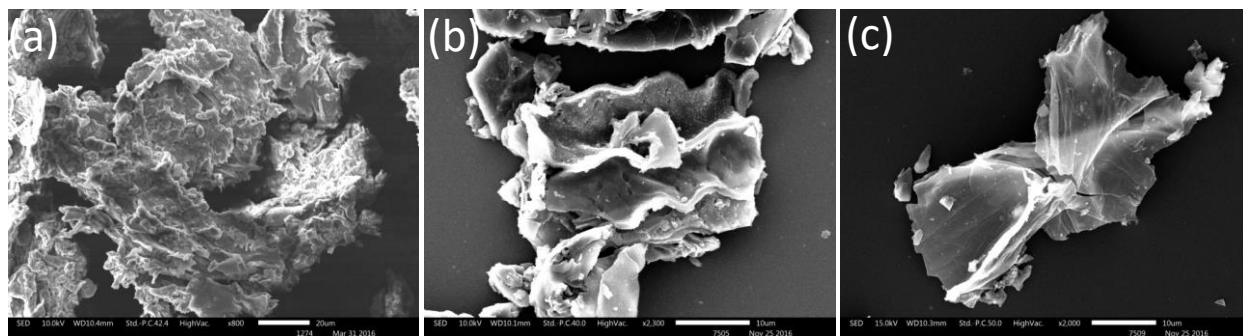

Figure S5. Microscopic surface analysis: SEM images of (a) Pre-carbonized sample (PS-P), (b) PS-C, (c) PS-G. Scale Bars: (a) 20  $\mu\text{m}$ , (b) 10  $\mu\text{m}$  & (c) 10  $\mu\text{m}$  respectively.

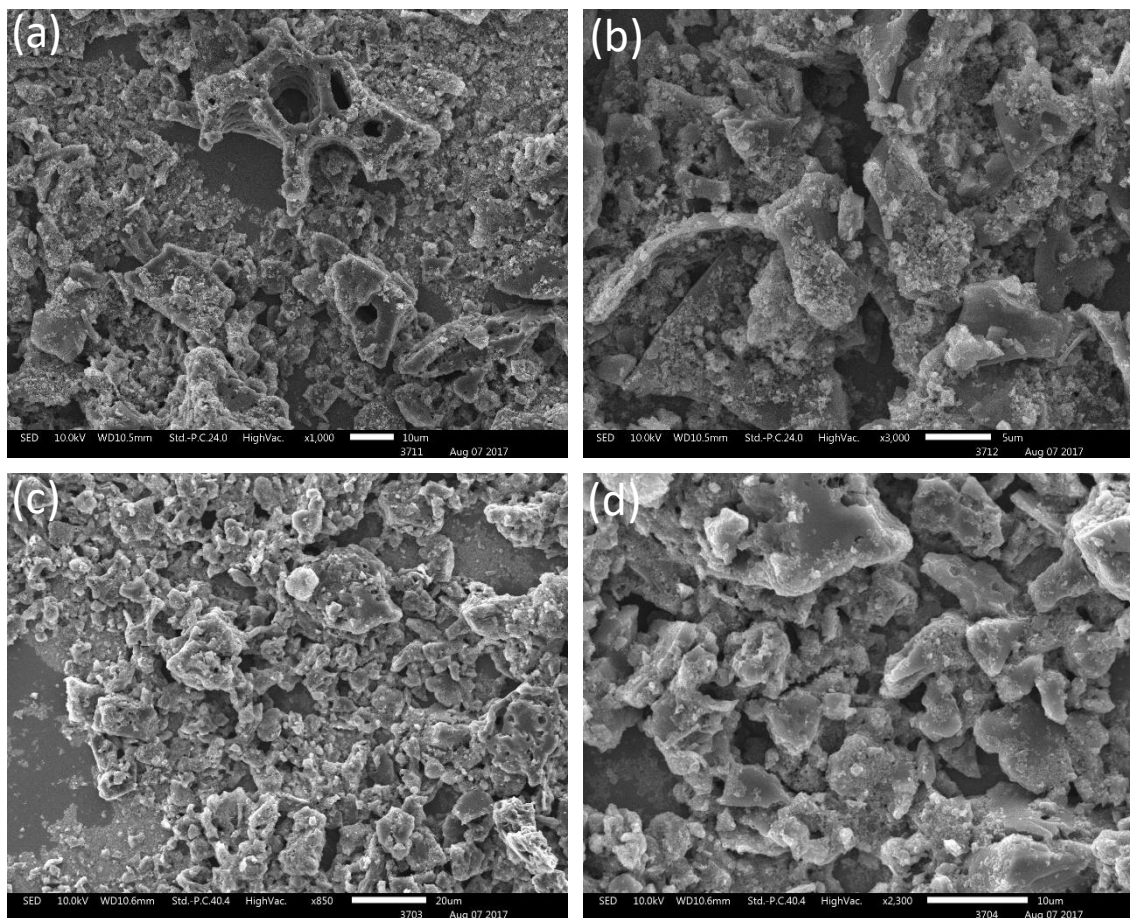

Figure S6. Comparative surface morphological studies: (a) & (b) Microscopic SEM images of Almond Shell Carbon (AS-C). Scale bar: 10 µm & 5 µm. (c) & (d) SEM images of Walnut Shell Carbon (WS-C). Scale bar: 20 µm & 10 µm.



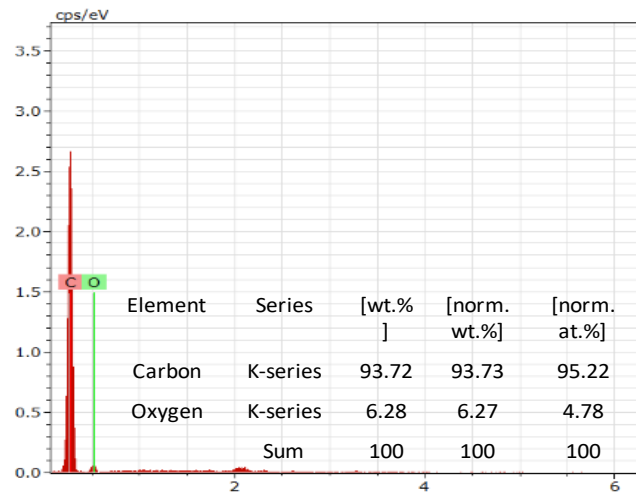

Figure S7. EDS graphs showing elemental distributions in PS-FLG.

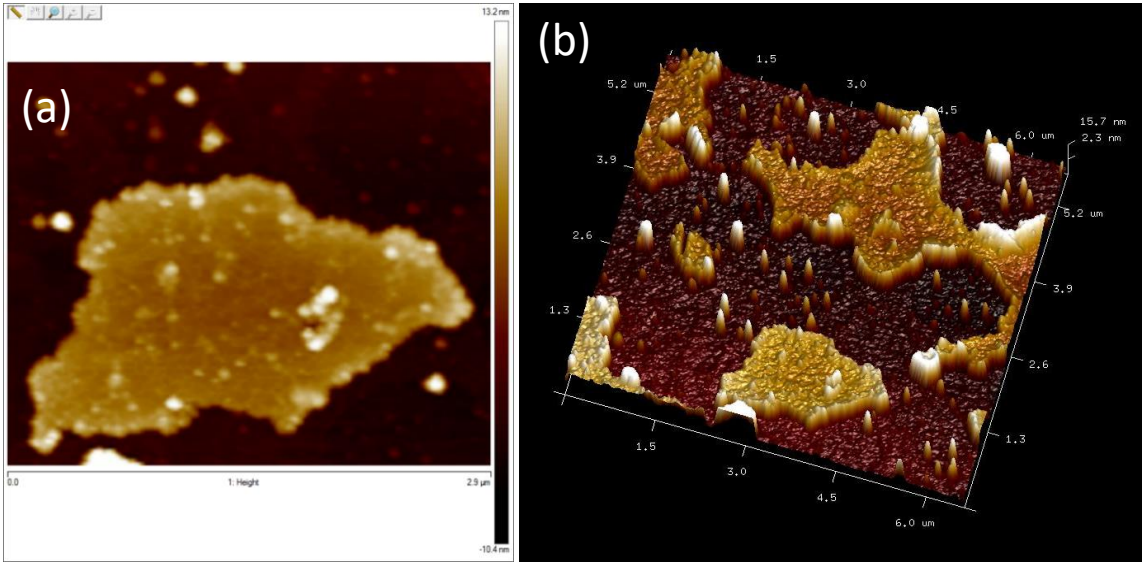

Figure S8. Tapping-mode AFM images of PS-FLG: (a) 2D image at 2.9  $\mu\text{m}$  (b) 3D mapping of PS-FLG.

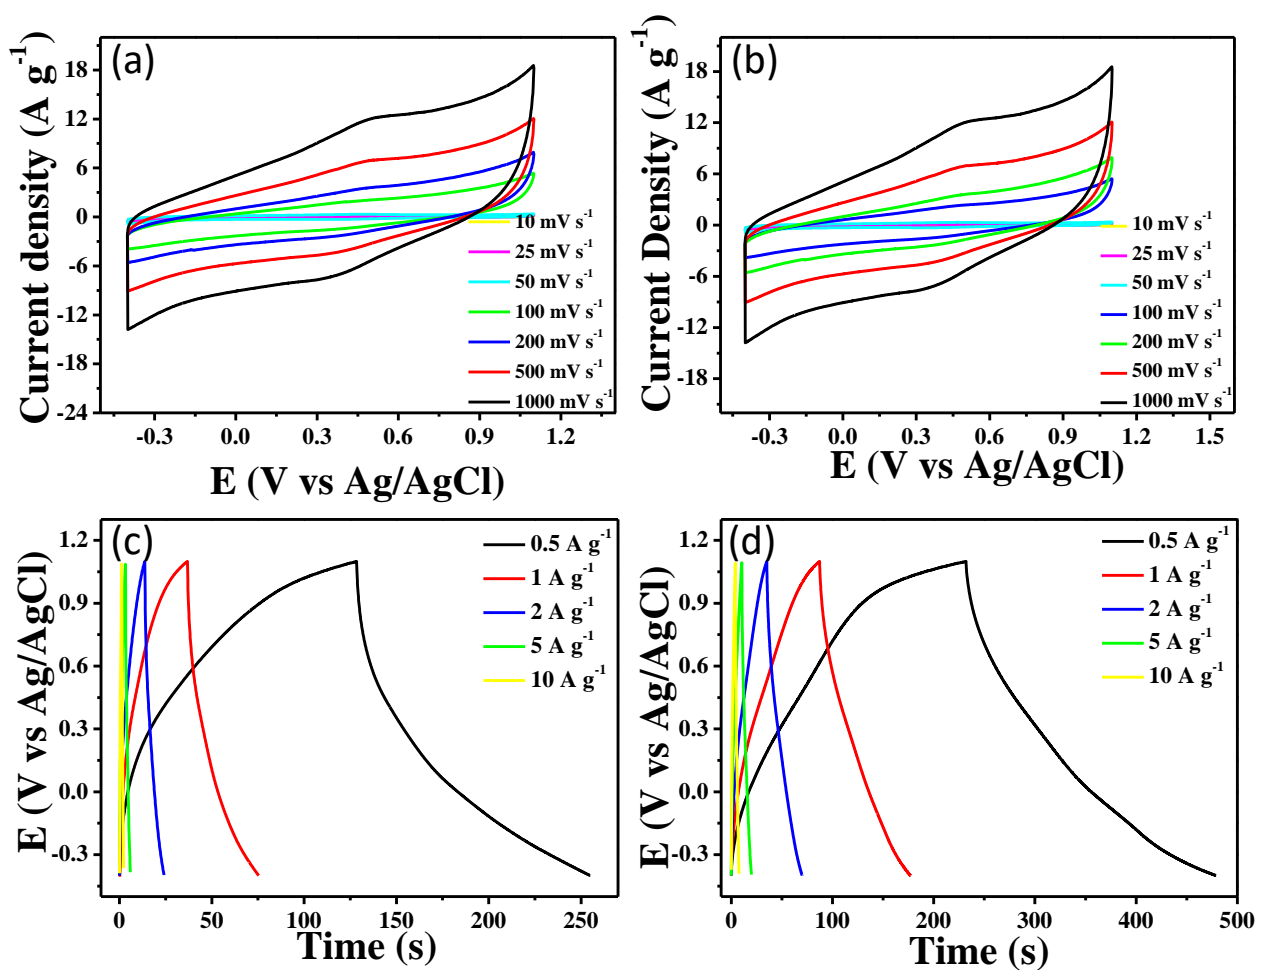

Figure S9: Cyclic voltammogram of (a) WS-C and (b) AS-C at different scan rates. Galvanostatic charge-discharge profile of (c) WS-C and (d) AS-C at different current densities.

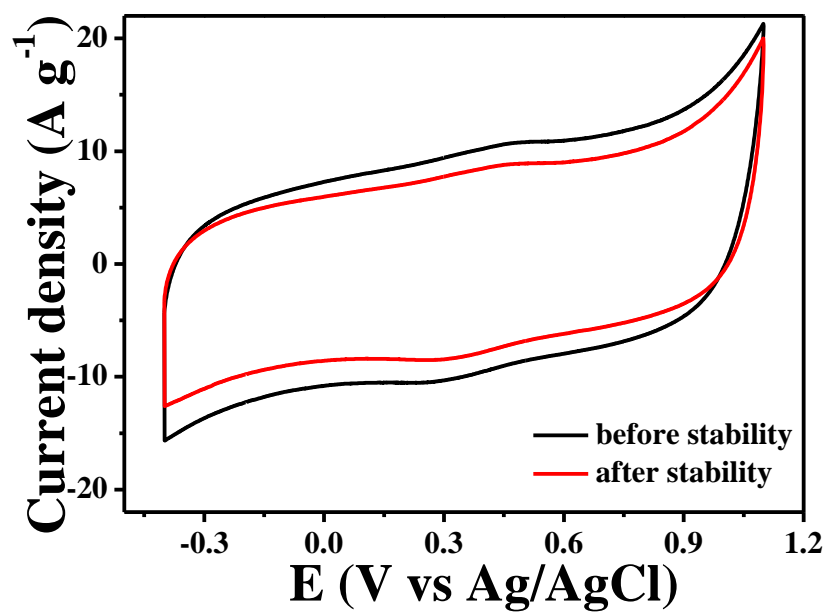

Figure S10: CV curves obtained before and after 5000 cycles of GCD at 10 A g<sup>-1</sup>

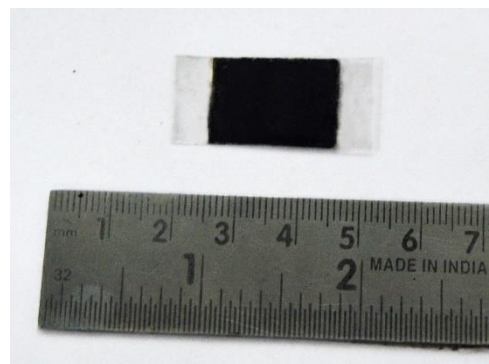

Figure S11: Digital picture of PS-FLG based solid-state supercapacitor device.

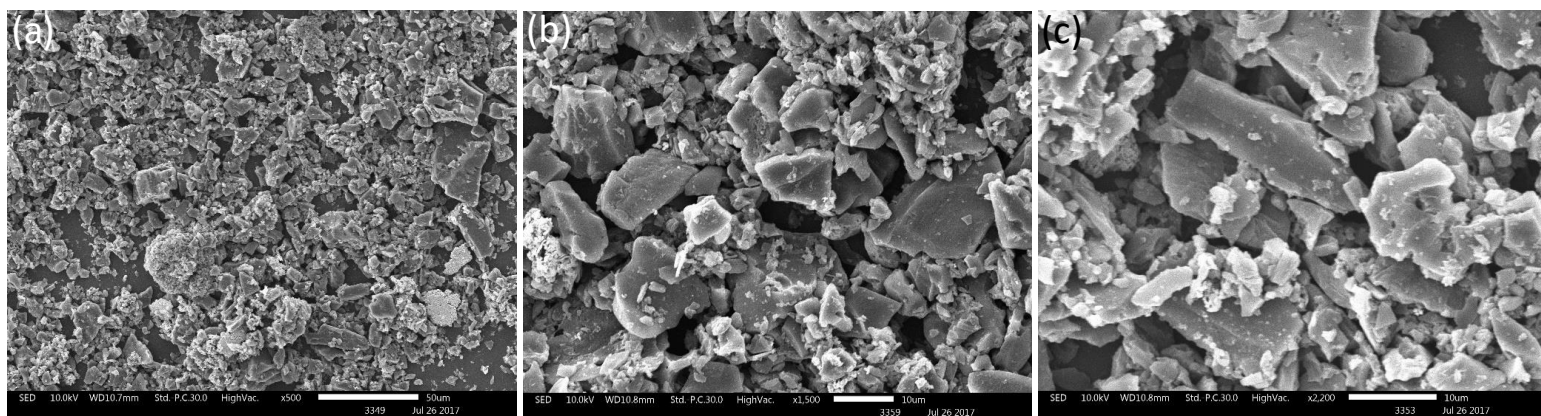

Figure S12. Microscopic SEM images of the solid-state device surface after modifying with the active material, PS-FLG. Scale bar: 50  $\mu\text{m}$ , 10  $\mu\text{m}$  & 10  $\mu\text{m}$ .

Figure S13: Supporting video describes the performance and output deliverance of a supercapacitor device after charging it for 60 sec. the discharging performance of the device was monitored for 180 s.

File name: Supporting video-1

(See video attachment for details)

Table S1: Summarization of surface parameters of PS based materials

| <b>Samples</b> | <b>S<sub>BET</sub> (m<sup>2</sup>g<sup>-1</sup>)</b> | <b>Pore size (nm)</b> | <b>Pore Volume (cc g<sup>-1</sup>)</b> |
|----------------|------------------------------------------------------|-----------------------|----------------------------------------|
| PS-C           | 645                                                  | 1.14                  | 0.37                                   |
| PS-G           | 1554                                                 | 1.22                  | 0.93                                   |
| <b>PS-FLG</b>  | <b>2070</b>                                          | <b>1.28</b>           | <b>1.33</b>                            |
| WS-C           | 363                                                  | 1.85                  | 0.047                                  |
| AS-C           | 403                                                  | 1.96                  | 0.035                                  |
